# Supplementary material
Source: ML conference proceedings conference paper supplement (https://openaccess.thecvf.com/content/ICCV2023/html/Rymarczyk_ICICLE_Interpretable_Class_ICCV_2023_paper.html)
Supplement: Supplementary file 3 [file Rymarczyk_ICICLE_Interpretable_Class_ICCV_2023_supplemental.zip]

Archive with 2 entries (2 files):
- 06303-supp.pdf
- __MACOSX/._06303-supp.pdf
